# Supplementary material for: Polymorphism in A3MF6 (A = Rb, Cs; M = Al, Ga) grown using mixed halide fluxes
Source: Royal Society of Chemistry journal article supplement (doi:10.1039/d3dt00352c), 2023-01-01
Supplement: d3dt00352c1.pdf [file d3dt00352c1.pdf]

## **Polymorphism in $A_3MF_6$ (A = Rb, Cs; M = Al, Ga) Grown using Mixed Halide Fluxes**

Gregory Morrison,<sup>a</sup> Lakshani W. Masachchi,<sup>a</sup> Hunter B. Tisdale,<sup>a</sup> Tieyan Chang,<sup>b</sup> Virginia G. Jones,<sup>a</sup> K. Pilar Zamorano,<sup>a</sup> Logan S. Breton,<sup>a</sup> Mark D. Smith,<sup>a</sup> Yu-Sheng Chen,<sup>b</sup> Hans-Conrad zur Loye\*,<sup>a</sup>

<sup>a</sup>*Department of Chemistry and Biochemistry, University of South Carolina, Columbia, SC, 29208*

<sup>b</sup>*NSF's ChemMatCARS, The University of Chicago, Lemont, IL, 60439*

\*Corresponding author. E-mail: zurLoye@mailbox.sc.edu

## Comparison of the Two Models for $m\text{-Cs}_3\text{GaF}_6$

Table S1 compares the crystallographic data for the two models for  $m\text{-Cs}_3\text{GaF}_6$ .  $m\text{-Cs}_3\text{GaF}_6\text{-GM}$  is the model described in the manuscript whereas  $m\text{-Cs}_3\text{GaF}_6\text{-MDS}$  is the second, independently solved structure. Note that post structure solution, the atoms were renumbered and the origin was shifted to aid in comparison with the original model. Figure S1 highlights the structural differences between the two models. Only two substantial differences exist between the two models, namely, the F atom locations in the disordered  $\text{Ga}(2)\text{F}_6$  polyhedron are approximated differently and one of the Cs atoms in the original model was modeled as disordered whereas they were all modeled as single positions in the second model. The two differences are discussed below.

The first difference between the two models is how the fluorine atoms in the  $\text{Ga}(2)\text{F}_6$  polyhedra are modeled. It should be noted that these polyhedra are very disordered and in both cases the modeled fluorine positions are only an approximation of the actual disorder. In  $m\text{-Cs}_3\text{GaF}_6\text{-GM}$ , the two symmetrically equivalent axial F atoms are modeled as having three positions each and the four symmetrically equivalent equatorial F atoms are also modeled as having three positions each. The occupancies of these positions were refined but constrained to result in three distinct orientations of the  $\text{Ga}(2)\text{F}_6$  polyhedron, and the F atomic displacement parameters were modeled anisotropically. In  $m\text{-Cs}_3\text{GaF}_6\text{-MDS}$ , the two symmetrically equivalent axial F atoms are modeled as having four positions each and the four symmetrically equivalent equatorial F atoms are also modeled as having four positions each. The occupancies of these positions are all constrained to 25%, and the F atomic displacement parameters were modeled isotropically.

The second difference between the two models is that  $m\text{-Cs}_3\text{GaF}_6\text{-GM}$  models the Cs(1) position as disordered across two sites whereas  $m\text{-Cs}_3\text{GaF}_6\text{-MDS}$  models the Cs(1) as a single, fully occupied position. While modeled as a single position, a residual electron density peak is observed in  $m\text{-Cs}_3\text{GaF}_6\text{-MDS}$  in the location of the Cs(1b) site in  $m\text{-Cs}_3\text{GaF}_6\text{-GM}$ . Due to the large size and low charge of Cs and its resulting high ionicity, low bond directionality, and weak bonding, it is extremely common to observe Cs disorder within structures. There are plenty of recent examples of disordered Cs in the literature, both from our group<sup>1-4</sup> and from others.<sup>5-12</sup> In  $m\text{-Cs}_3\text{MF}_6$ , disorder in the Cs(1) position is particularly expected as these Cs atoms are adjacent to disordered  $\text{M}(2)\text{F}_6$  polyhedra. For this reason, we chose to model the Cs(1) position as disordered in the  $m\text{-Cs}_3\text{AlF}_6$  and  $m\text{-Cs}_3\text{GaF}_6$  models included in the manuscript. The Cs(1b) and F(2c) atoms were constrained to have the same occupancy as the other two F(2) sites are too close to Cs(1b) to exist at the same time. Separately refining the Cs(1b) and F(2c) occupancies resulted in respective occupancies of 31.2% and 31.7% for  $m\text{-Cs}_3\text{AlF}_6$  and 31.0% and 31.6% for  $m\text{-Cs}_3\text{GaF}_6$ , whereas, constraining the two occupancies led to occupancies of 31.5 % and 31.4 %, respectively. It should be noted that similar magnitude residual electron density peaks exist near other Cs atoms where modelling them would result in physically impossible bond distances and that modelling the Cs(1) position as a single or disordered site had little effect on the refinement statistics.

**Table S1.** Crystallographic data for SCXRD structure refinements of the reported models.

| Compound                                                                                                                          | <i>m</i> -Cs <sub>3</sub> GaF <sub>6</sub> -GM | <i>m</i> -Cs <sub>3</sub> GaF <sub>6</sub> -MDS |
|-----------------------------------------------------------------------------------------------------------------------------------|------------------------------------------------|-------------------------------------------------|
| Space group                                                                                                                       | <i>C2/m</i>                                    | <i>C2/m</i>                                     |
| Pearson Symbol                                                                                                                    | mC120                                          | mC120                                           |
| <i>a</i> (Å)                                                                                                                      | 11.3996(3)                                     | 11.396(6)                                       |
| <i>b</i> (Å)                                                                                                                      | 19.7132(4)                                     | 19.760(11)                                      |
| <i>c</i> (Å)                                                                                                                      | 11.4551(4)                                     | 11.453(6)                                       |
| $\beta$ (°)                                                                                                                       | 109.7000(10)                                   | 109.72(2)                                       |
| <i>V</i> (Å <sup>3</sup> )                                                                                                        | 2423.55(12)                                    | 2428(2)                                         |
| <i>Z</i>                                                                                                                          | 12                                             | 12                                              |
| Crystal size (mm <sup>3</sup> )                                                                                                   | 0.04 x 0.04 x 0.04                             | 0.06 x 0.03 x 0.02                              |
| Temperature (K)                                                                                                                   | 300(2)                                         | 301(2)                                          |
| Density (g cm <sup>-3</sup> )                                                                                                     | 4.789                                          | 4.780                                           |
| $\theta$ Range (°)                                                                                                                | 2.161 – 33.137                                 | 1.889 – 30.027                                  |
| $\mu$ (mm <sup>-1</sup> )                                                                                                         | 16.760                                         | 16.730                                          |
| Data Collection and Refinement                                                                                                    |                                                |                                                 |
| Collected reflections                                                                                                             | 102291                                         | 82746                                           |
| Unique reflections                                                                                                                | 4759                                           | 3663                                            |
| <i>R</i> <sub>int</sub>                                                                                                           | 0.0376                                         | 0.0487                                          |
| <i>h</i>                                                                                                                          | -17 ≤ <i>h</i> ≤ 17                            | -16 ≤ <i>h</i> ≤ 16                             |
| <i>k</i>                                                                                                                          | -30 ≤ <i>k</i> ≤ 30                            | -27 ≤ <i>k</i> ≤ 27                             |
| <i>l</i>                                                                                                                          | -17 ≤ <i>l</i> ≤ 17                            | -16 ≤ <i>l</i> ≤ 16                             |
| $\Delta\rho_{\max}$ (e Å <sup>-3</sup> )                                                                                          | 4.065                                          | 3.399                                           |
| $\Delta\rho_{\min}$ (e Å <sup>-3</sup> )                                                                                          | -3.099                                         | -2.781                                          |
| GoF                                                                                                                               | 1.159                                          | 1.154                                           |
| Extinction coefficient                                                                                                            | 0.000159(14)                                   | -                                               |
| <sup>a</sup> <i>R</i> <sub>1</sub> ( <i>F</i> ) for <i>F</i> <sub>o</sub> <sup>2</sup> > 2σ( <i>F</i> <sub>o</sub> <sup>2</sup> ) | 0.0281                                         | 0.0278                                          |
| <sup>b</sup> <i>R</i> <sub>w</sub> ( <i>F</i> <sub>o</sub> <sup>2</sup> )                                                         | 0.0717                                         | 0.0675                                          |

$$^a R_1 = \frac{\sum ||F_o| - |F_c||}{\sum |F_o|}$$

$$^b wR_2 = \left[ \frac{\sum w(F_o^2 - F_c^2)^2}{\sum w(F_o^2)^2} \right]^{1/2}; P = (F_o^2 + 2F_c^2)/3; w = 1/[\sigma^2(F_o^2) + (0.0291P)^2 + 25.0230P] \text{ for } m\text{-Cs}_3\text{GaF}_6; w = 1/[\sigma^2(F_o^2) + (0.0238P)^2 + 33.5978P] \text{ for } m\text{-Cs}_3\text{GaF}_6\text{-MDS}.$$

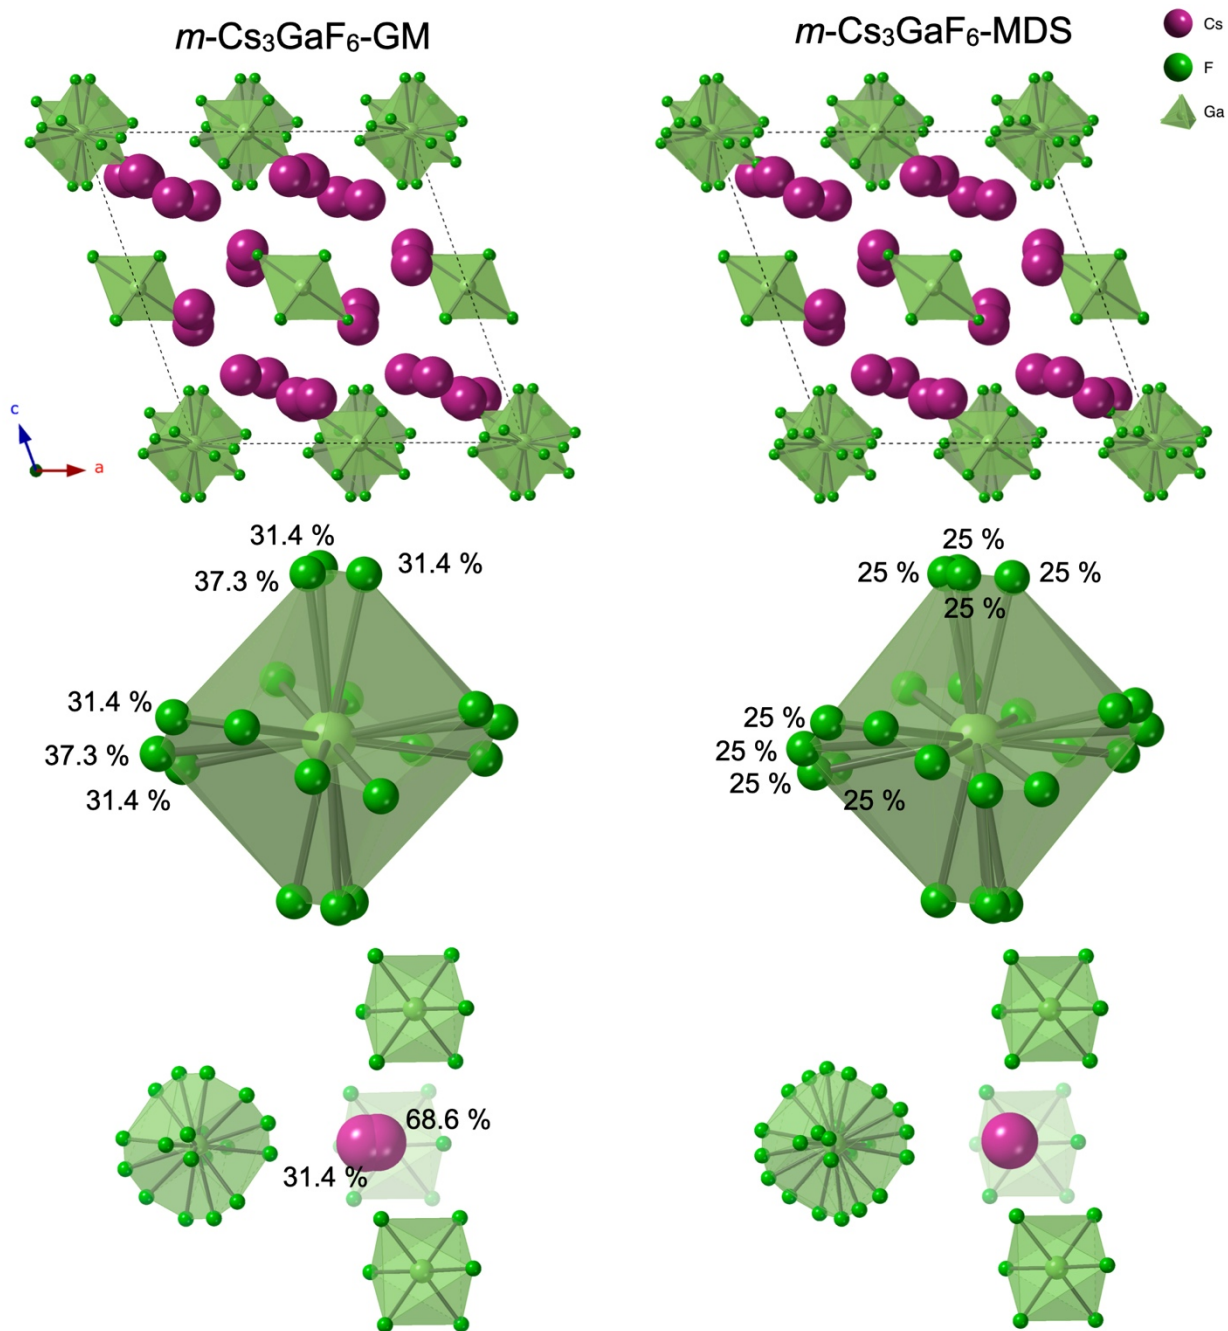

Figure S1. Comparison of the two structure models for  $m\text{-Cs}_3\text{GaF}_6$ , showing (top) a view down the  $b$ -direction, (middle) the disordered  $\text{Ga}(2)\text{F}_6$  polyhedron, and (bottom) the local environment surrounding the disordered or ordered Cs(1) atom.

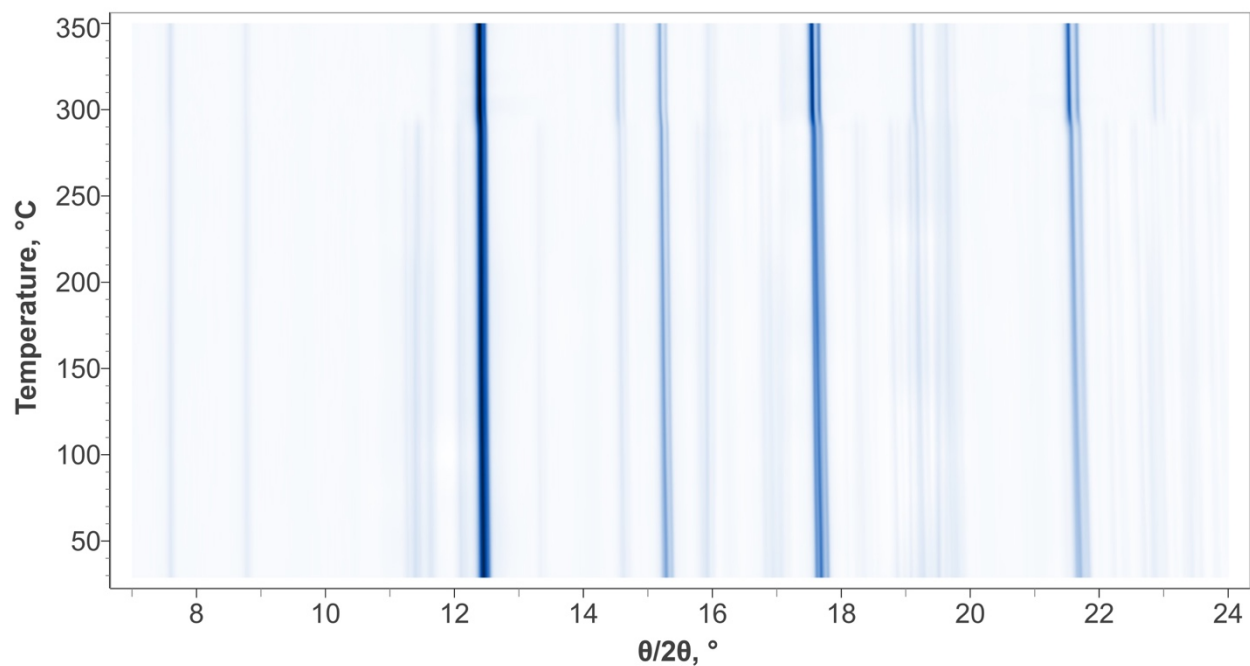

Figure S2. Waterfall plot showing the change in PXR pattern (Mo K $\alpha$ ) upon heating for Cs<sub>3</sub>AlF<sub>6</sub>, highlighting the structure transition from *m*-Cs<sub>3</sub>AlF<sub>6</sub> to *c*-Cs<sub>3</sub>AlF<sub>6</sub> at 291.2 °C.

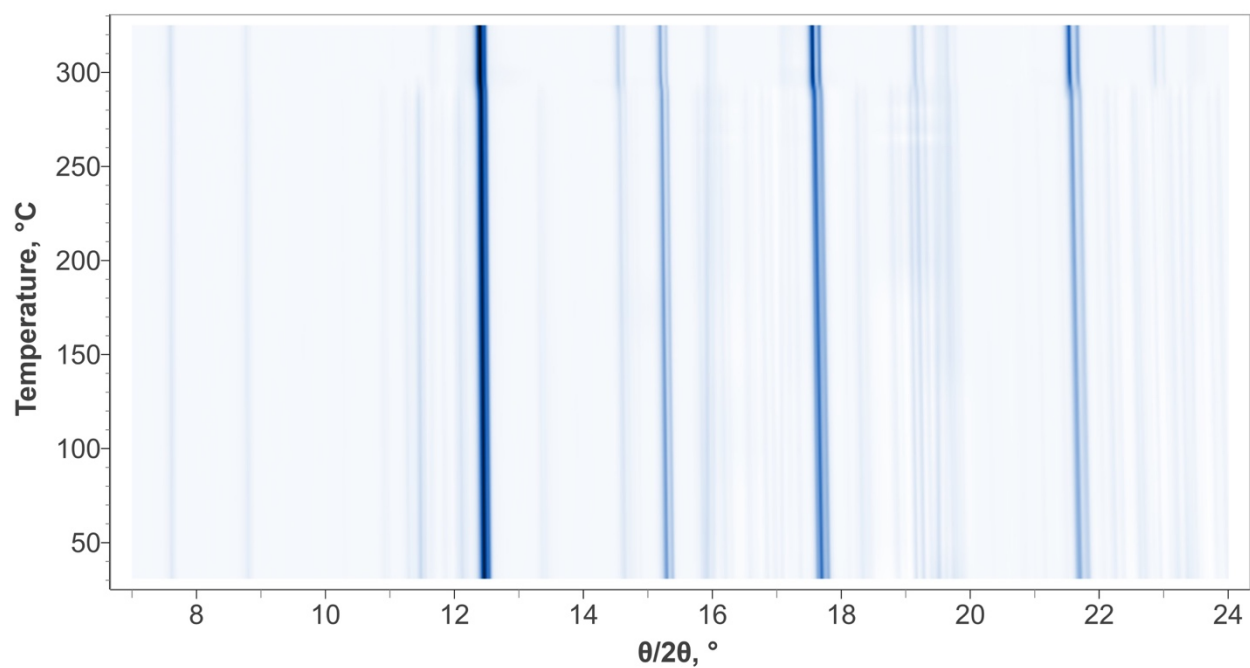

Figure S3. Waterfall plot showing the change in PXR pattern (Mo K $\alpha$ ) upon cooling for Cs<sub>3</sub>AlF<sub>6</sub>, highlighting the structure transition from *c*-Cs<sub>3</sub>AlF<sub>6</sub> to *o*-Cs<sub>3</sub>AlF<sub>6</sub> at 290.0 °C.

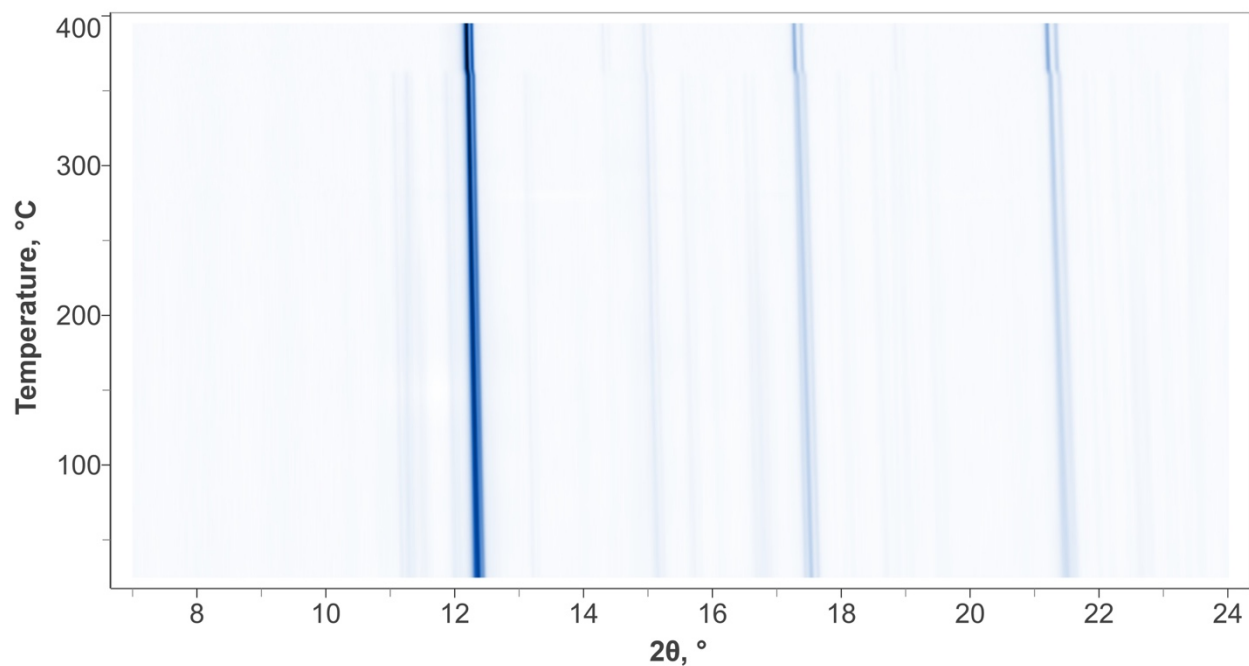

Figure S4. Waterfall plot showing the change in PXR pattern (Mo K $\alpha$ ) upon heating for Cs<sub>3</sub>GaF<sub>6</sub>, highlighting the structure transition from *m*-Cs<sub>3</sub>GaF<sub>6</sub> to *c*-Cs<sub>3</sub>GaF<sub>6</sub> at 367.2 °C.

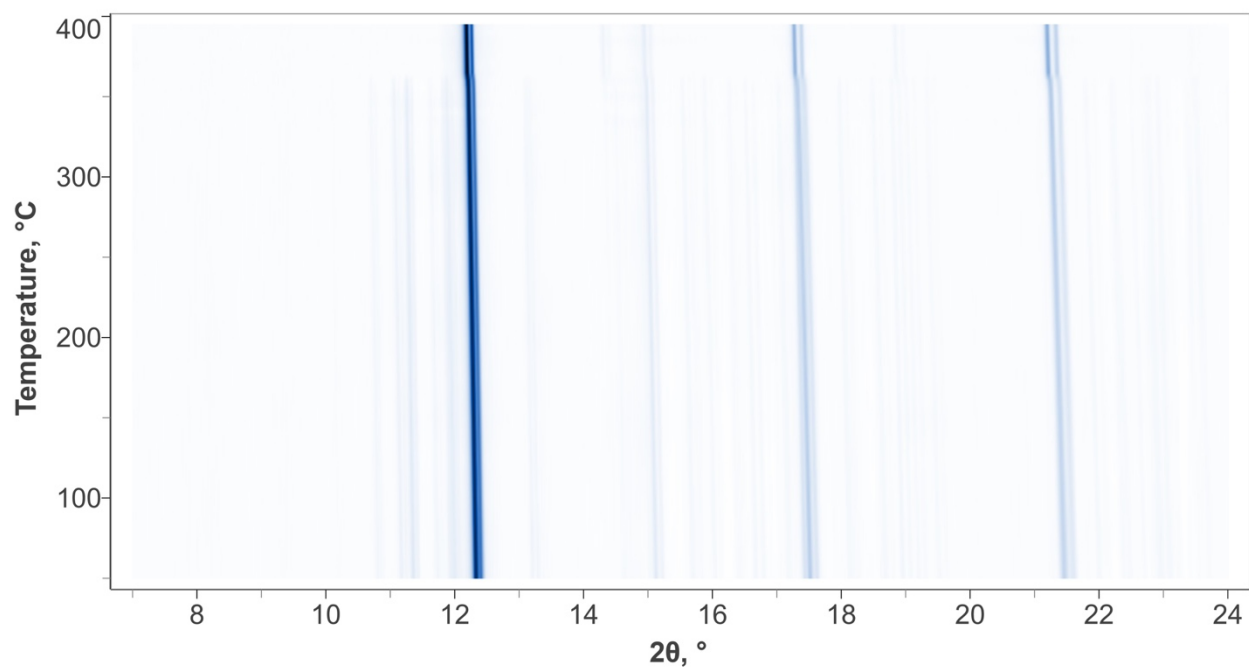

Figure S5. Waterfall plot showing the change in PXR pattern (Mo K $\alpha$ ) upon cooling for Cs<sub>3</sub>GaF<sub>6</sub>, highlighting the structure transition from *c*-Cs<sub>3</sub>GaF<sub>6</sub> to *o*-Cs<sub>3</sub>GaF<sub>6</sub> at 366.5 °C.

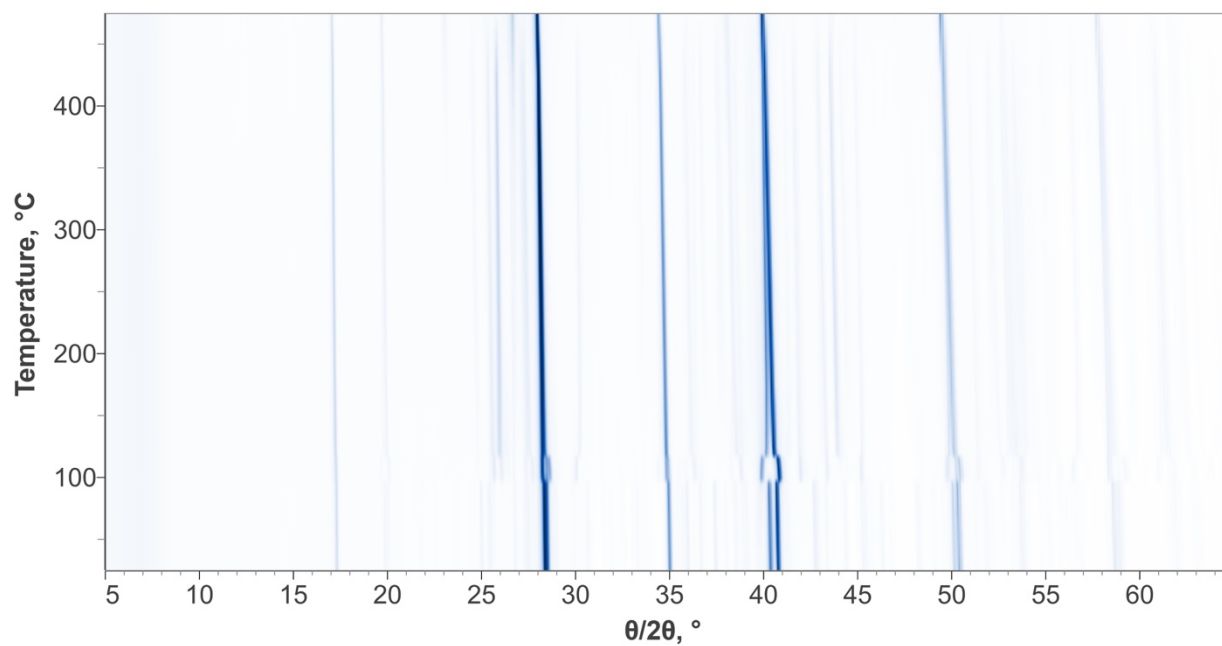

Figure S6. Waterfall plot showing the change in PXRD pattern ( $\text{Cu K}\alpha$ ) upon heating for  $\text{Rb}_3\text{GaF}_6$ , highlighting the three structure transitions from  $t\text{-Cs}_3\text{GaF}_6$  to two intermediate phases prior to forming  $c\text{-Cs}_3\text{GaF}_6$  at  $397.2^{\circ}\text{C}$ .

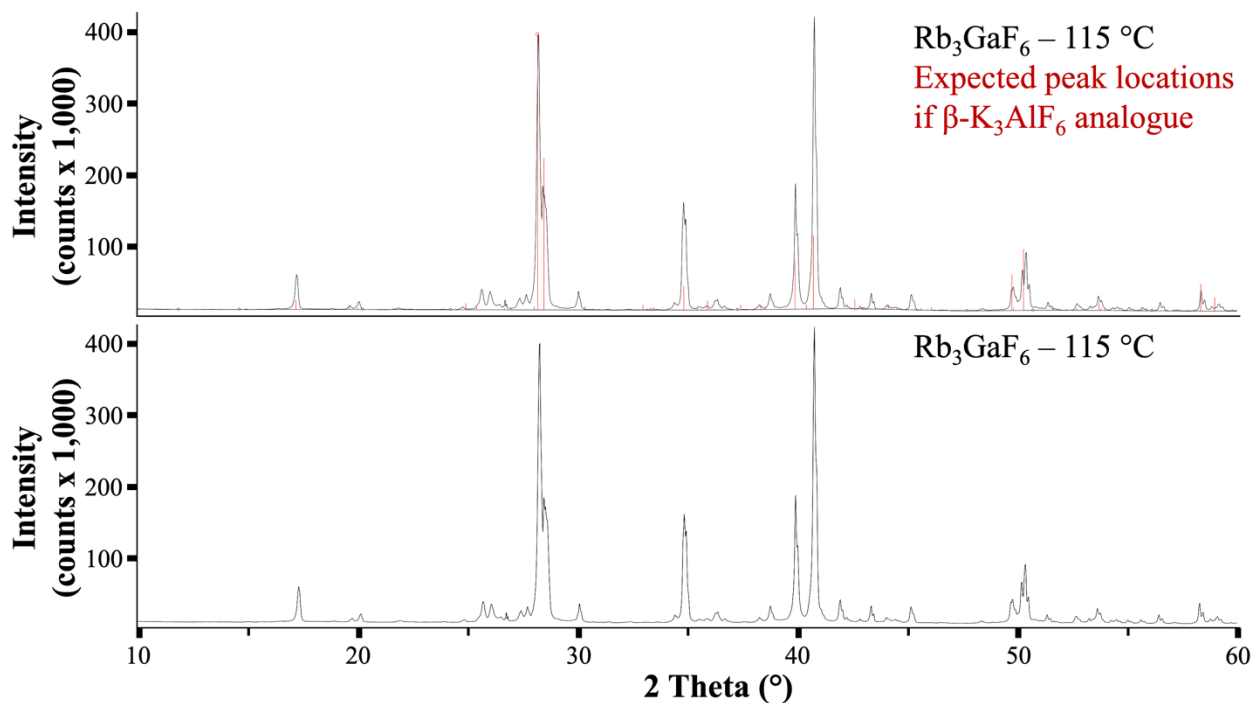

S7. Powder XRD data ( $\text{Cu K}\alpha$ ) for  $\text{Rb}_3\text{GaF}_6$  at  $115\text{ }^\circ\text{C}$  showing (bottom) the experimental data and (top) the experimental data (black) with the expected peak locations if the compound is analogous to  $\beta\text{-K}_3\text{AlF}_6$  (red). The powder pattern was calculated using the  $\beta\text{-K}_3\text{AlF}_6$  CIF with the K atoms changed to Rb atoms, the Al atoms changed to Ga atoms, and the lattice parameters changed to the best fitting parameters, which were obtained by refinement using the Rigaku SmartLab Studio II software:  $a = 14.0056(14)\text{ \AA}$  and  $c = 9.0358(11)\text{ \AA}$ .

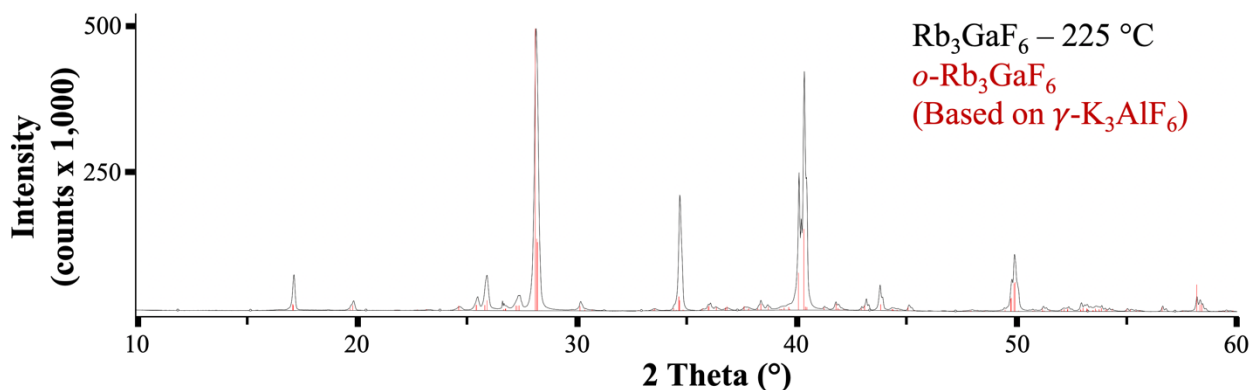

S8. Powder XRD data ( $\text{Cu K}\alpha$ ) for  $\text{Rb}_3\text{GaF}_6$  at  $225\text{ }^\circ\text{C}$  showing the experimental data (black) and pattern calculated based on the  $\gamma\text{-K}_3\text{AlF}_6$  CIF (red). The powder pattern was calculated by changing the K atoms to Rb atoms, changing the Al atoms to Ga atoms, and changing the lattice parameters to those obtained by refinement using the Rigaku SmartLab Studio II software:  $a = 37.959(4)\text{ \AA}$ ,  $b = 12.6368(12)\text{ \AA}$ , and  $c = 17.9872(12)\text{ \AA}$ .



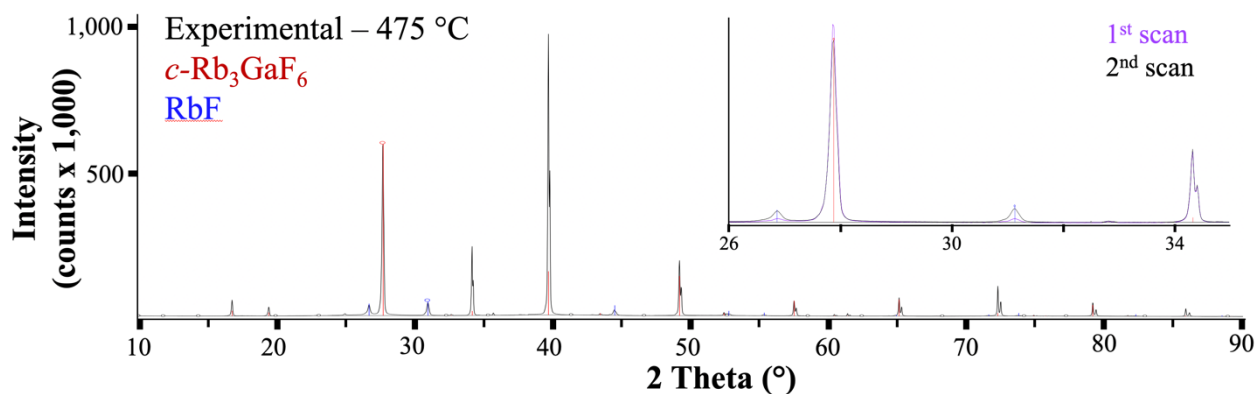

S9. Powder XRD data ( $\text{Cu K}\alpha$ ) for  $\text{Rb}_3\text{GaF}_6$  at 475 °C showing the experimental data (black) and pattern calculated from the CIF (red). The inset shows two consecutive scans showing that the extra peaks (identified as RbF) grow in over time. Such sample decomposition was not observed in the TGA.

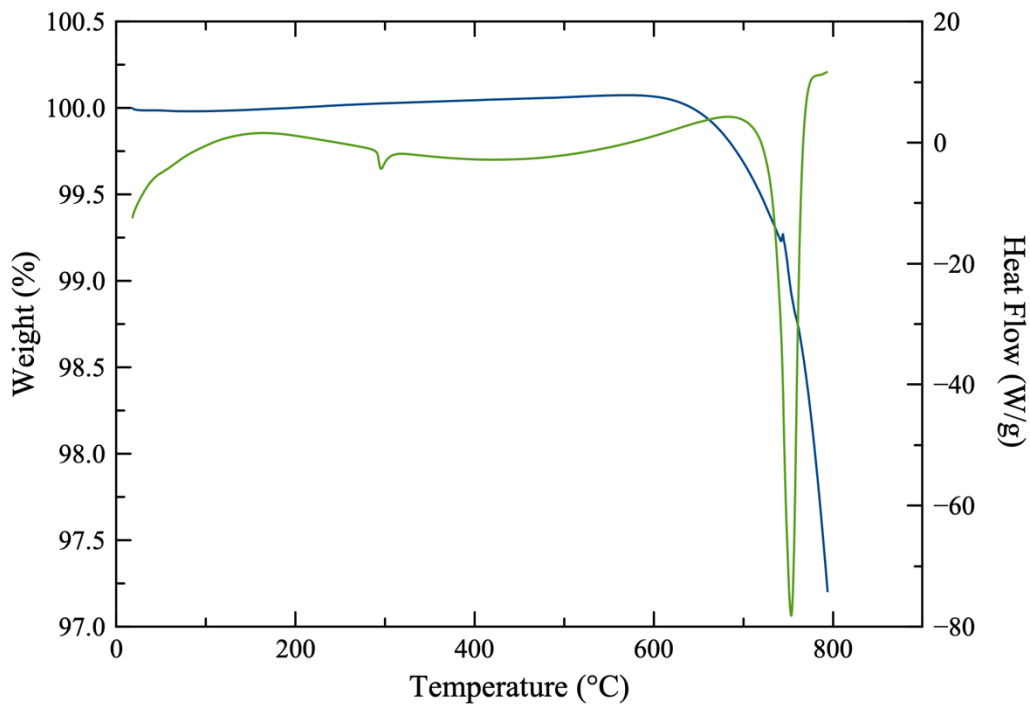

Figure S10. TGA data for  $\text{Cs}_3\text{AlF}_6$  showing the weight change (blue) and heat flow (green) during heating.

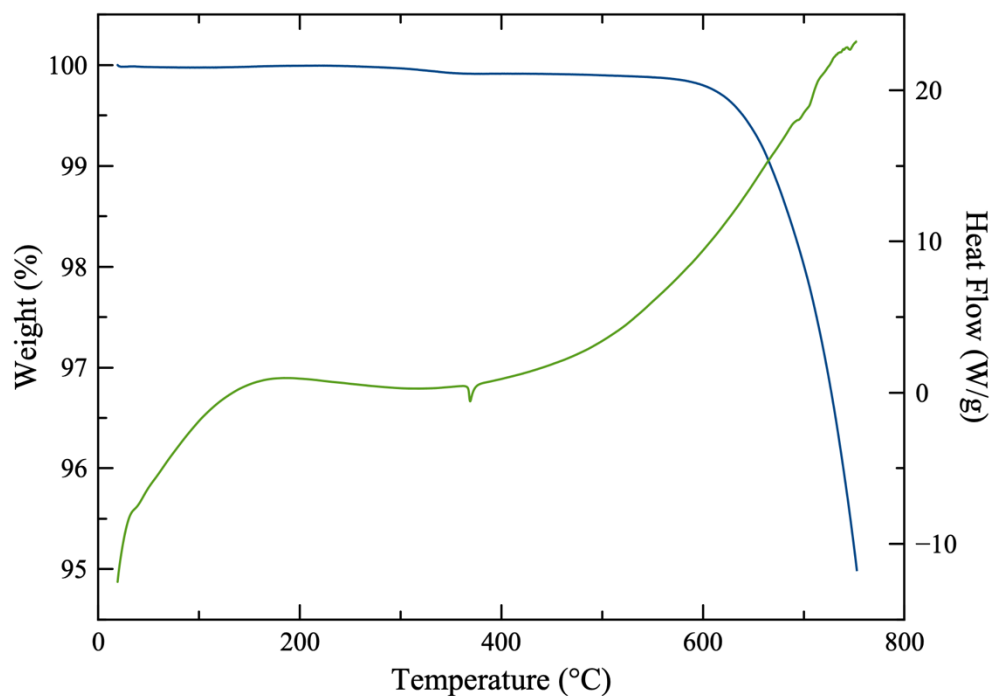

Figure S11. TGA data for  $\text{Cs}_3\text{GaF}_6$  showing the weight change (blue) and heat flow (green) during heating.

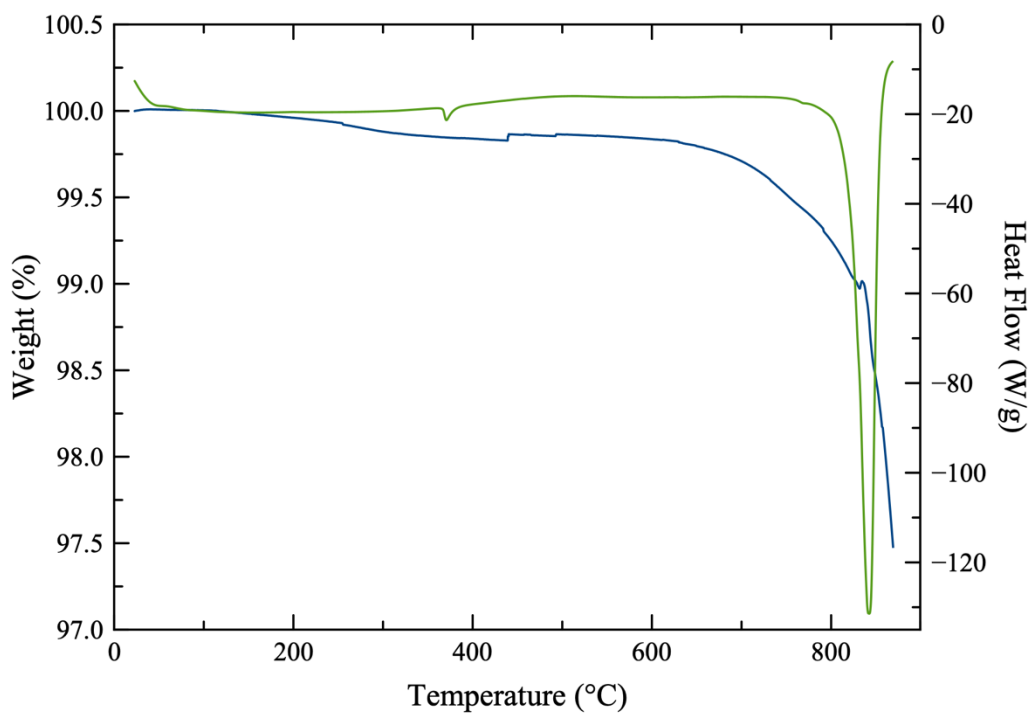

Figure S12. TGA data for  $\text{Rb}_3\text{AlF}_6$  showing the weight change (blue) and heat flow (green) during heating.

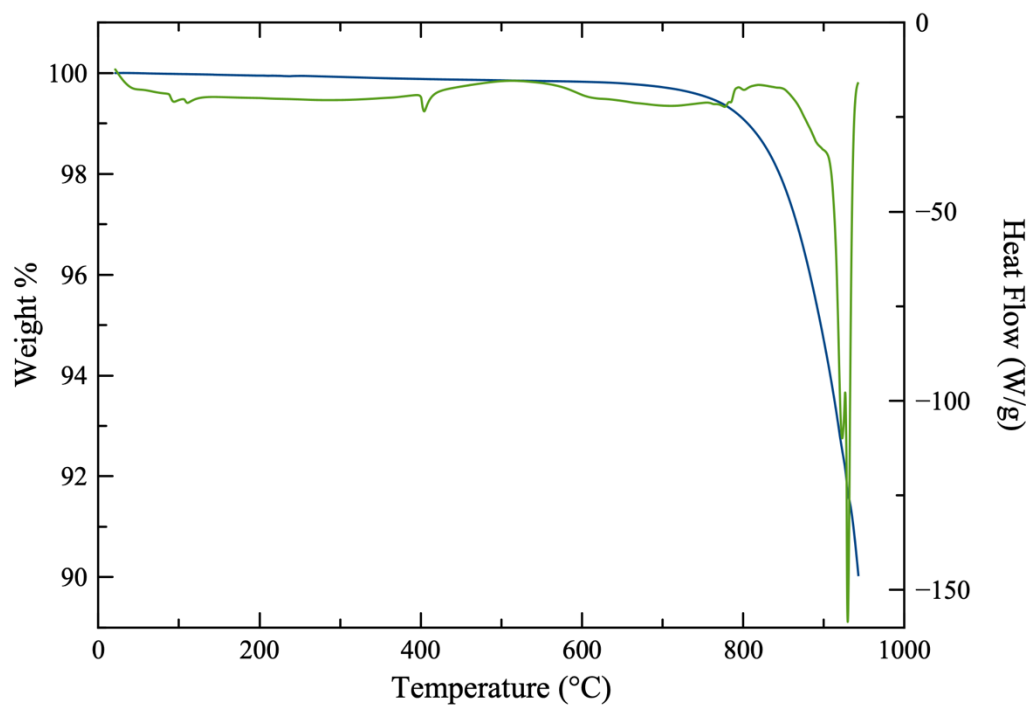

Figure S13. TGA data for  $\text{Rb}_3\text{GaF}_6$  showing the weight change (blue) and heat flow (green) during heating.

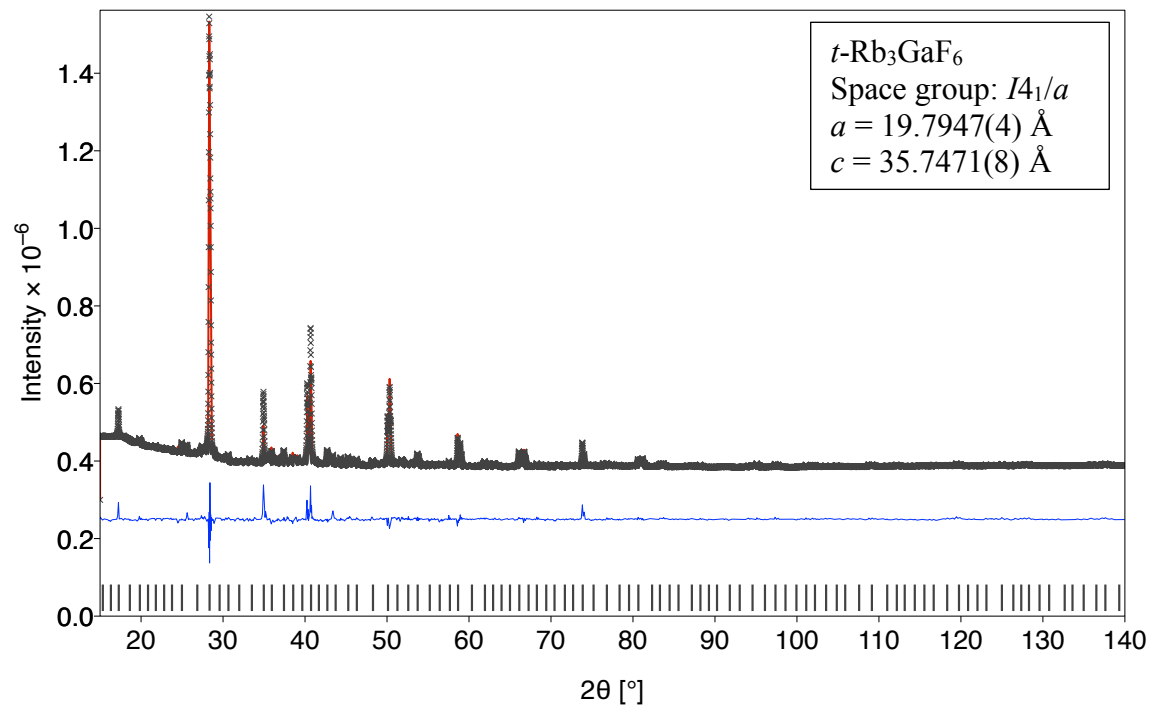

Figure S14: Rietveld refinement plot of  $\text{Rb}_3\text{GaF}_6$  at room temperature; red line is Rietveld fit, black X's are observed PXRD ( $\text{Cu } K_\alpha$ ), blue line is residual, and vertical black ticks are allowed Bragg reflections.

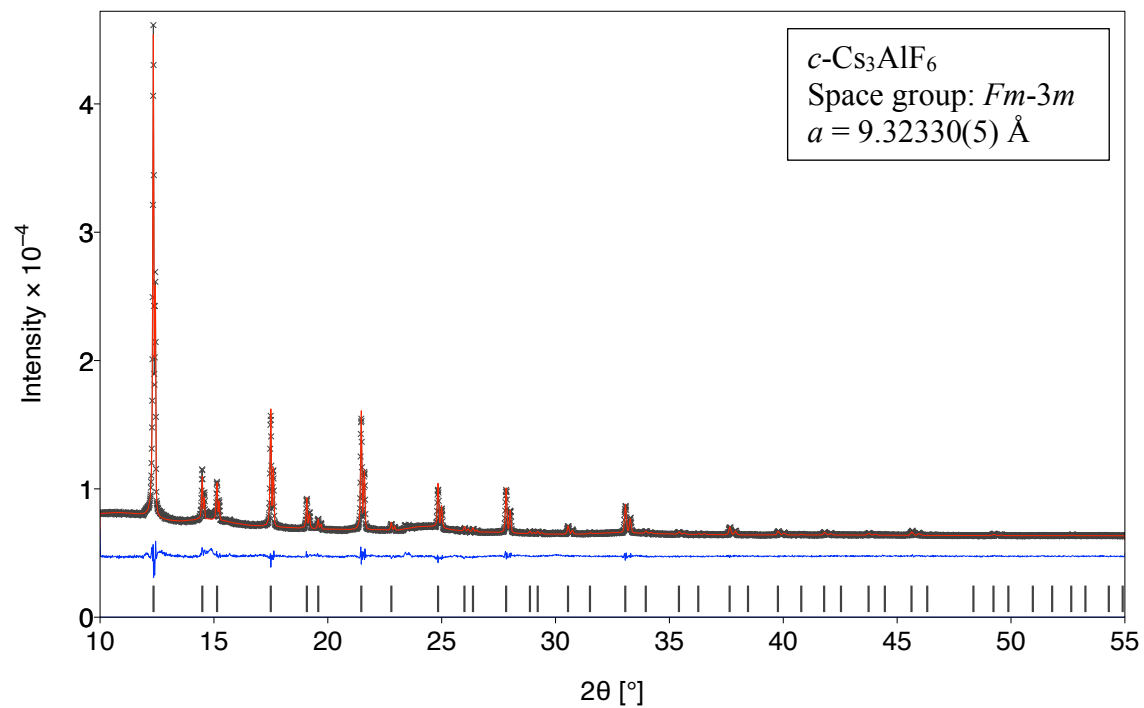

Figure S15: Rietveld refinement plot of  $\text{Cs}_3\text{AlF}_6$  at  $350^\circ\text{C}$ ; red line is Rietveld fit, black X's are observed PXRD ( $\text{Mo } K_\alpha$ ), blue line is residual, and vertical black ticks are allowed Bragg reflections.

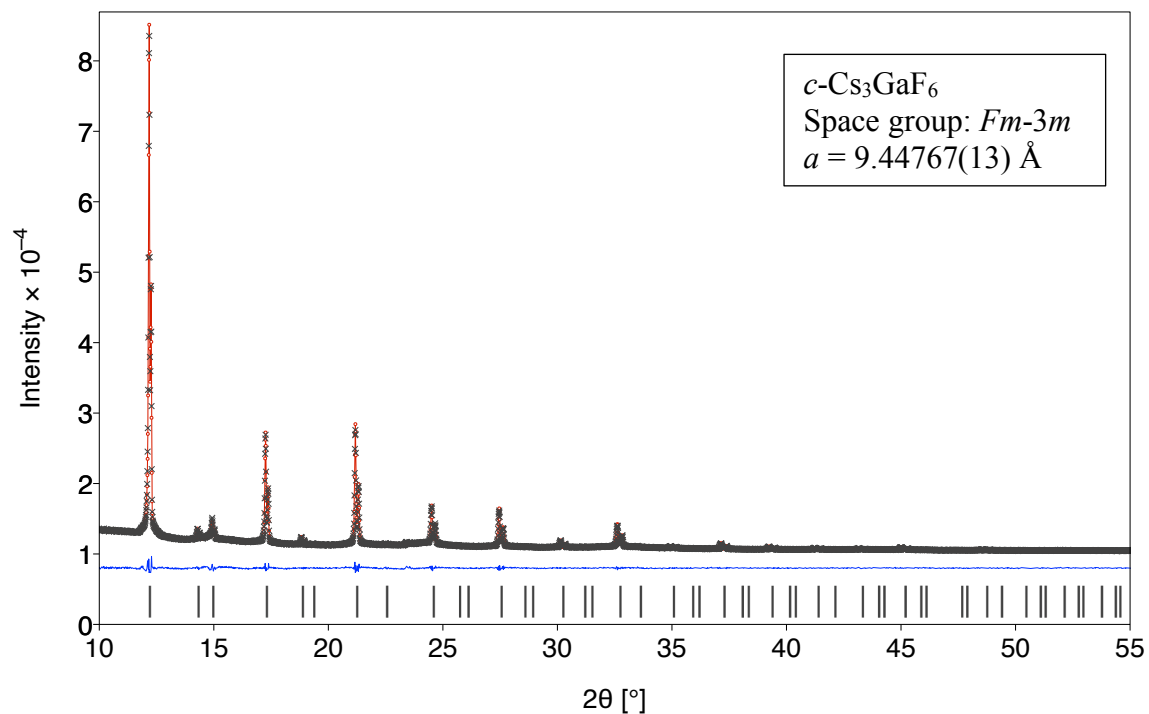

Figure S16: Rietveld refinement plot of  $\text{Cs}_3\text{GaF}_6$  at  $400^\circ\text{C}$ ; red line is Rietveld fit, black X's are observed PXRD ( $\text{Mo } K_\alpha$ ), blue line is residual, and vertical black ticks are allowed Bragg reflections.

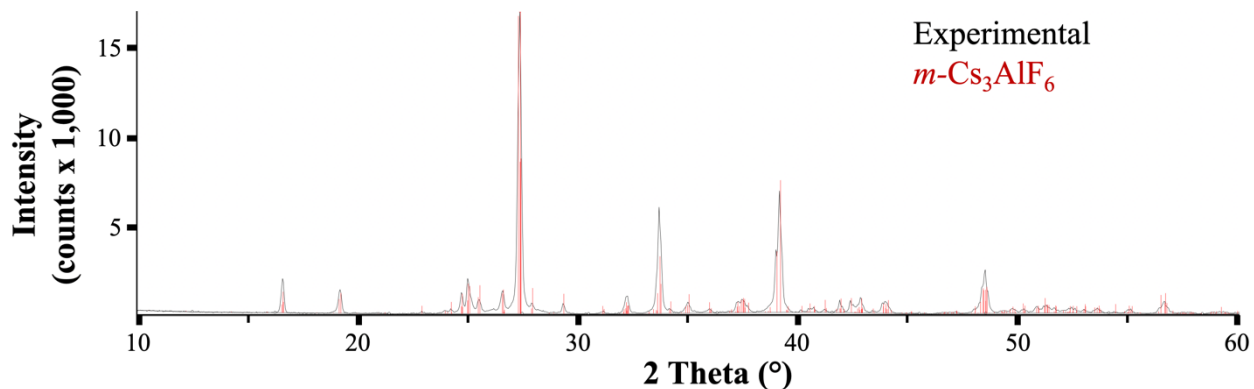

Figure S17. Powder XRD data ( $\text{Cu K}\alpha$ ) for  $m\text{-Cs}_3\text{AlF}_6$  showing the experimental data (black) and pattern calculated from the CIF (red).

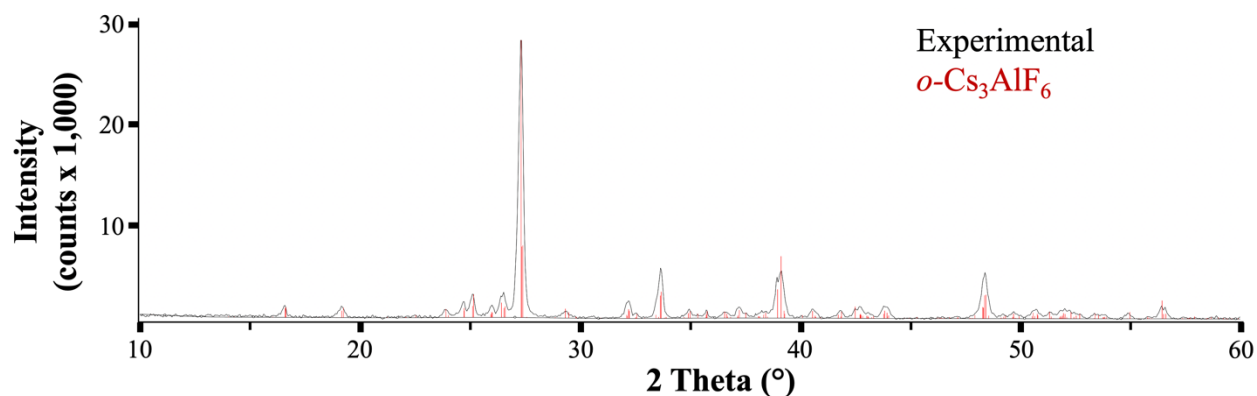

Figure S18. Powder XRD data ( $\text{Cu K}\alpha$ ) for  $o\text{-Cs}_3\text{AlF}_6$  showing the experimental data (black) and pattern calculated from the CIF (red).

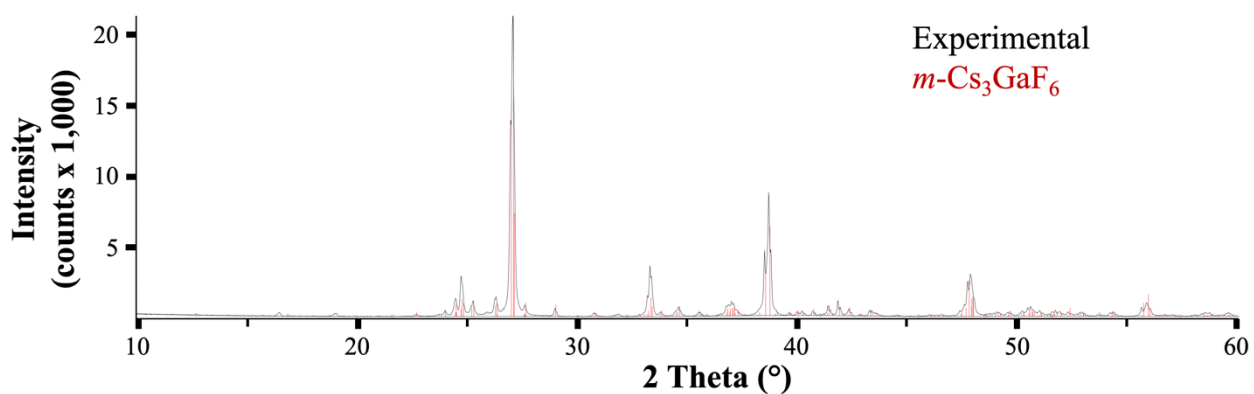

Figure S19. Powder XRD data ( $\text{Cu K}\alpha$ ) for  $m\text{-Cs}_3\text{GaF}_6$  showing the experimental data (black) and pattern calculated from the CIF (red).

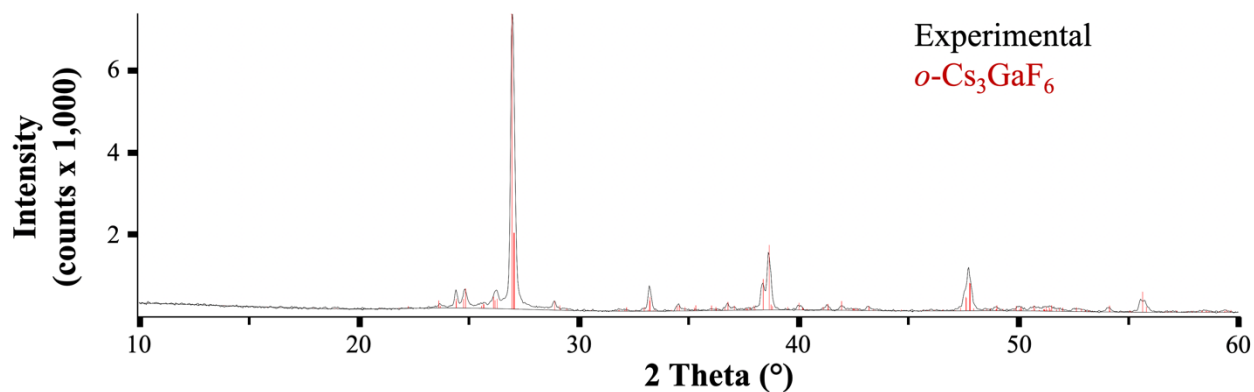

Figure S20. Powder XRD data (Cu K $\alpha$ ) for *o*-Cs<sub>3</sub>GaF<sub>6</sub> showing the experimental data (black) and pattern calculated from the CIF (red).

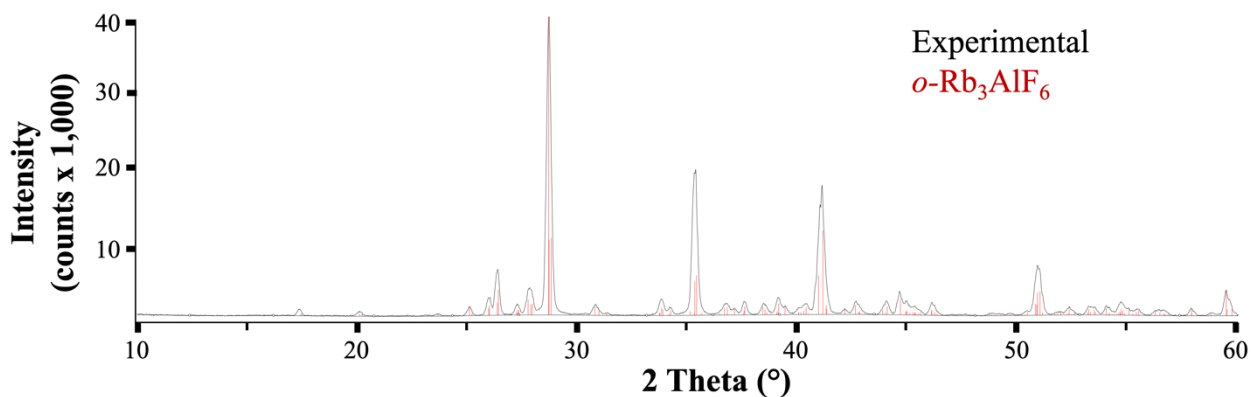

Figure S21. Powder XRD data (Cu K $\alpha$ ) for *o*-Rb<sub>3</sub>AlF<sub>6</sub> showing the experimental data (black) and pattern calculated from the CIF (red).

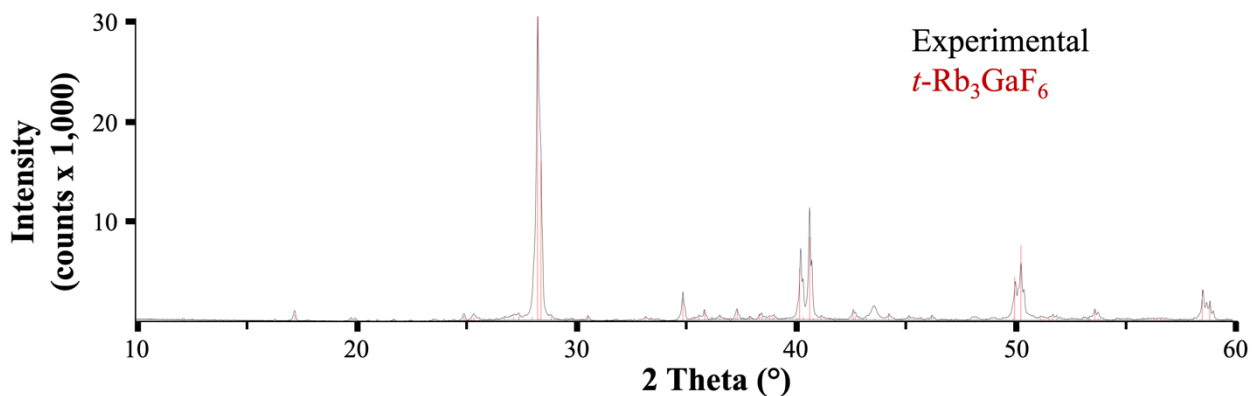

Figure S22. Powder XRD data (Cu K $\alpha$ ) for *t*-Rb<sub>3</sub>GaF<sub>6</sub> showing the experimental data (black) and pattern calculated from the CIF (red).
